# Supplementary material for: A human pluripotent stem cell model for the analysis of metabolic dysfunction in hepatic steatosis
Source: PubMed Central journal article supplement — iScience. 2020 Dec 11;24(1):101931. doi: 10.1016/j.isci.2020.101931 (PMC7773967; doi:10.1016/j.isci.2020.101931), 2020-12-11
Supplement: mmc1.pdf [file mmc1.pdf]

## **Supplemental Information**

### **A human pluripotent stem cell model for the analysis of metabolic dysfunction in hepatic steatosis**

**Matthew C. Sinton, Jose Meseguer-Ripolles, Baltasar Lucendo-Villarin, Sara Wernig-Zorc, John P. Thomson, Roderick N. Carter, Marcus J. Lyall, Paul D. Walker, Alpesh Thakker, Richard R. Meehan, Gareth G. Lavery, Nicholas M. Morton, Christian Ludwig, Daniel A. Tennant, David C. Hay, and Amanda J. Drake**

1

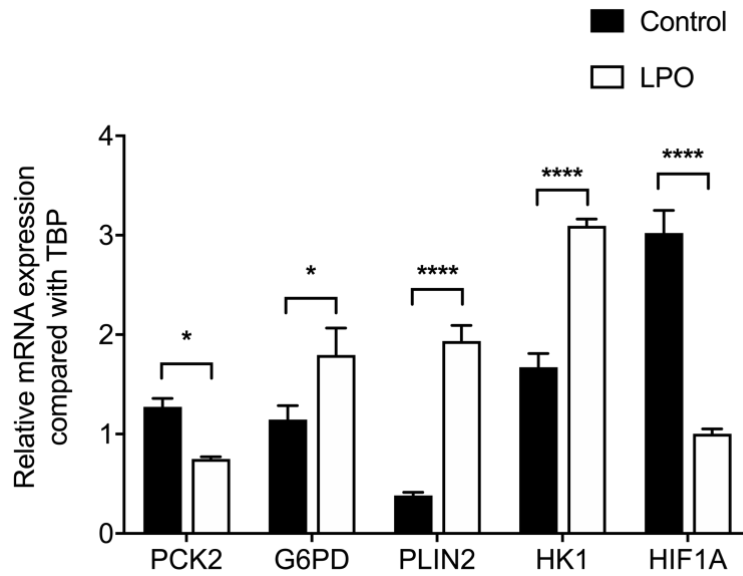

2

3 **Figure S1.** Validation of mRNA sequencing analysis by RT-qPCR. Data were analysed using  
4 two-tailed Student t-test and expressed as mean  $\pm$  SD, \* $p < 0.05$ , \*\*\*\* $p < 0.0001$ . Related to  
5 Figure 2.  
6

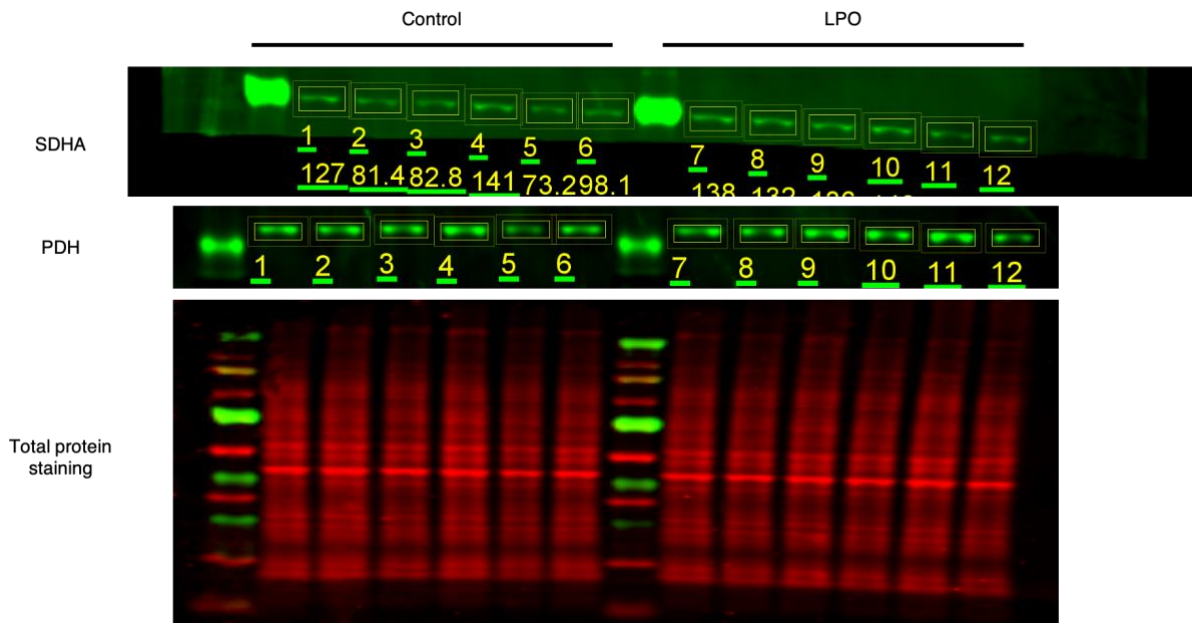

7

8 **Figure S2.** Representative blot of succinate dehydrogenase subunit A (SDHA) and pyruvate  
9 dehydrogenase (PDH)  $\alpha 1$  and  $\alpha 2$  subunits, with total protein staining. Molecular weight band  
10 of SDHA = 70 kDa. Molecular weight band of PDh = 38 kDa. Related to Figure 3.  
11

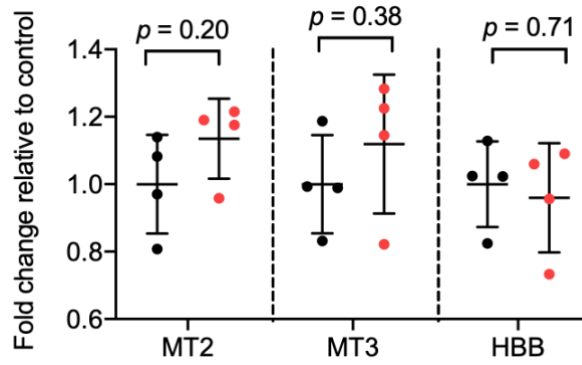

12

13 **Figure S3.** Measurement of mitochondrial (mitochondrial region 2 (MT2); mitochondrial region  
 14 3 (MT3)) and nuclear (beta-globin (HBB)) DNA. Data are expressed as mean  $\pm$  SD. Related  
 15 to Figure 3.

16

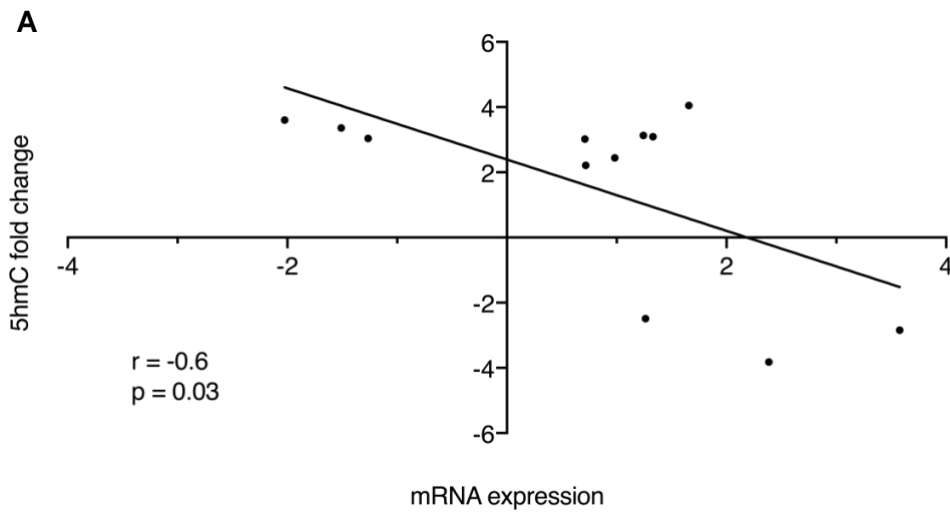

17

18 **Figure S4.** Steatotic HLCs show a moderate negative correlation between promoter 5hmC  
 19 enrichment and mRNA expression, Related to Figure 7.

20

| Gene  | Forward sequence         | Reverse sequence       | Probe |
|-------|--------------------------|------------------------|-------|
| TBP   | GAACATCATGGATCAGAACAACA  | ATAGGGATTCCGGGAGTCAT   | 87    |
| NANOG | ATGCCTCACACGGAGACTGT     | CAGGGCTGTCCTGAATAAGC   | 69    |
| ALB   | GTGAGGTTGCTCATCGGTTT     | GAGCAAAGGCAATCAACACC   | 7     |
| HNF4A | AGCAACGGACAGATGTGTGA     | TCAGACCCTGAGCCACCT     | 27    |
| PLIN2 | TCAGCTCCATTCTACTGTTCCACC | CCTGAATTTTCTGATTGGCACT | 72    |
| PLIN4 | AGTTCCAAGCCAGGGACAC      | TGCTGGGCCTTTTCAATC     | 1     |
| PLIN5 | TACAGTGCAGCCAAGGACAG     | CGCACACGCAGTTCTCAG     | 3     |
| PCK2  | CGAAAGCTCCCAAGTACAA      | GCTCTCTACTCGTGCCACATC  | 20    |
| G6PD  | AACAGAGTGAGCCCTTCTTCA    | GGAGGCTGCATCATCGTACT   | 5     |
| PLIN2 | TCAGCTCCATTCTACTGTTCCACC | CCTGAATTTTCTGATTGGCACT | 72    |
| HK1   | GACCAAGTTTCTCTCTCAGATCG  | CCTAGCTGCTGGAGGATAGC   | 1     |
| HIF1A | GATAGCAAGACTTTCCTCAGTCG  | TGGCTCATATCCCATCAATTC  | 64    |

21 **Table S1.** Primer pairs and probes used to quantify mRNA expression, Related to Figure 1  
22 and Figure 2.

23

| Gene | Forward Primer       | Reverse Primer       |
|------|----------------------|----------------------|
| MT1  | CTCACTCTCACTGCCCAAGA | TGAGAATGAGTGTGAGGCGT |
| MT2  | ACCCACCAATCACATGCCTA | GTGTTACATCGCGCCATCAT |
| HBB  | TGGTGCATCTGACTCCTGAG | TCTCCACATGCCAGTTTCT  |

24 **Table S2.** Primer pairs used to quantify mitochondrial and nuclear DNA, Related to Figure 3.

25

| <b>Gene</b>                          | <b>Forward sequence</b> | <b>Reverse sequence</b> |
|--------------------------------------|-------------------------|-------------------------|
| GAPDH promoter –<br>negative control | CGGCTACTAGCGGTTTTACG    | AAGAAGATGCGGCTGACTGT    |
| H19 genic –<br>positive control      | GATCTCGGCCCTAGTGTGAA    | GTGATGTGTGAGCCTGCACT    |
| UBIAD1 genic –<br>positive control   | CTCTTCCTCCTCCTCGTCCT    | CATCCAGGAACCACAGTCCT    |

26 **Table S3.** Primer sequences for validation of DNA immunoprecipitation protocol, Related to

27 Figure 7.

| <b>Pathways with upregulated genes</b>                     |                  |                                                                                                                                                                                                                           |
|------------------------------------------------------------|------------------|---------------------------------------------------------------------------------------------------------------------------------------------------------------------------------------------------------------------------|
| <i>Pathway</i>                                             | <i>Benjamini</i> | <i>Genes</i>                                                                                                                                                                                                              |
| hsa04713: Circadian entrainment                            | 4.20             | ADCY4, ADCY2, CACNA1I, GRIN1, GRIA3, PRKG1, PRKCB, KCNJ5, PLCB4, GRIN2D, CACNA1G, RYR1, GNG2, PER3, GNG4, MTNR1A                                                                                                          |
| hsa04724: Glutamatergic synapse                            | 4.15             | ADCY4, DLGAP1, ADCY2, GRIK2, GRIN1, GRIK5, GRIN3B, GRIA3, SHANK1, PRKCB, SLC17A7, GLS2, GRM4, PLCB4, GRIN2D, PLA2G4F, GNG2, GNG4, PLA2G4D                                                                                 |
| hsa04725: Cholinergic synapse                              | 3.59             | ADCY4, ACHE, ADCY2, KCNJ12, KCNJ14, PRKCB, KCNJ4, KCNQ4, KCNQ3, CHRM4, PLCB4, GNG2, PIK3R5, GNG4, KCNQ1, CHRNA3                                                                                                           |
| hsa04750: Inflammatory mediator regulation of TRP channels | 3.31             | ADCY4, ADCY2, TRPM8, TRPV2, ASIC3, ASIC1, PRKCB, PLCB4, PLA2G4F, PIK3R5, ALOX12, NGF, PLA2G4D                                                                                                                             |
| hsa05414: Dilated cardiomyopathy                           | 3.26             | ADCY4, ADCY2, ADRB1, SGCG, CACNG8, ITGA8, ITGA7, CACNB1, CACNB4, TNNI3, ITGA2B                                                                                                                                            |
| hsa04911: Insulin secretion                                | 3.23             | TRPM4, ADCY4, ADCY2, PLCB4, KCNN1, KCNN3, ATP1A3, RIMS2, PCLO, KCNJ11, PRKCB                                                                                                                                              |
| hsa04726: Serotonergic synapse                             | 3.14             | GABRB2, PRKCB, KCNJ5, PLCB4, ALOX15B, HTR7, SLC18A2, PLA2G4F, GNG2, HTR1D, HTR3A, GNG4, ALOX12, PLA2G4D                                                                                                                   |
| hsa04514: Cell adhesion molecules (CAMs)                   | 2.81             | ICAM1, NTNG1, NTNG2, CLDN10, CD40, HLA-DMB, CDH4, HLA-G, NCAM2, ITGA8, NLGN4X, PECAM1, CNTN1, HLA-DOA, CD6, ICOSLG                                                                                                        |
| hsa04921: Oxytocin signalling pathway                      | 2.66             | ADCY4, ADCY2, CACNG8, CACNB1, CACNB4, KCNJ12, TRPM2, KCNJ14, PRKCB, KCNJ5, KCNJ4, PLCB4, RYR1, PLA2G4F, NFATC1, PLA2G4D                                                                                                   |
| hsa04080: Neuroactive ligand-receptor interaction          | 2.43             | F2RL2, C5AR1, GABRB2, GRIK2, GRIN1, GABBR1, GRIK5, LPAR3, GRIA3, GRIN3B, P2RX5, GRM4, SSTR2, ADRB1, S1PR1, CHRM4, CHRNA9, SSTR1, GRIN2D, HTR7, CHRNA5, ADRA1A, CALCRL, HTR1D, CHRNA3, GRID1, MTNR1A                       |
| hsa04024: cAMP signalling pathway                          | 2.39             | ADCY4, HCN2, ADCY2, GRIN1, GABBR1, ATP1A3, GRIN3B, GRIA3, TNNI3, GLI1, SSTR2, ADRB1, SSTR1, PDE4A, GRIN2D, PIK3R5, HTR1D, HCAR2, NFATC1                                                                                   |
| hsa04020: Calcium signalling pathway                       | 2.37             | SLC8A3, ADCY4, SLC8A2, ADCY2, CACNA1I, GRIN1, PRKCB, P2RX5, PLCB4, ADRB1, ATP2A3, GRIN2D, HTR7, CACNA1G, RYR1, ADRA1A, PLCD1                                                                                              |
| hsa04014: Ras signalling pathway                           | 2.32             | FGF19, FGF5, FLT4, FGF17, EFNA3, GRIN1, FGF11, PRKCB, RASAL1, HTR7, RASGRP2, PLA2G4F, PLA1A, GNG2, PIK3R5, NGFR, SYNGAP1, GNG4, RASA4, PLA2G4D, NGF                                                                       |
| <b>Pathways with downregulated genes</b>                   |                  |                                                                                                                                                                                                                           |
| <i>Pathway</i>                                             | <i>Benjamini</i> | <i>Genes</i>                                                                                                                                                                                                              |
| hsa05322: Systemic lupus erythematosus                     | 6.65             | HIST1H2AB, C7, HIST1H4L, HIST1H2AG, C6, HIST1H2AE, HIST1H2BO, HIST2H2AB, HIST1H2BM, HIST1H4A, HIST1H2BL, HIST1H2BI, HIST2H2AC, HIST1H2BJ, H2AFX, HIST3H2BB, HIST1H4I, HIST1H4J, HIST2H3A, HIST1H3J, HIST1H2BB, HIST1H2BC, |

|                                                        |      |                                                                                                                                                                                                                                                                                                                                                                                                                                                 |
|--------------------------------------------------------|------|-------------------------------------------------------------------------------------------------------------------------------------------------------------------------------------------------------------------------------------------------------------------------------------------------------------------------------------------------------------------------------------------------------------------------------------------------|
|                                                        |      | HIST1H2BE, HIST1H2BF, HIST1H2BG, HIST1H2BH, ACTN2, HIST2H3C, HIST2H3D, HIST2H2BF, HIST1H3A, HIST1H3B, HIST1H2AI, HIST1H2AH, HIST1H3C, HIST1H3E, HIST1H2AJ, HIST1H3F, HIST1H2AM, HIST1H3G, HIST1H2AL, HIST1H3H, HIST1H3I                                                                                                                                                                                                                         |
| hsa00140: Steroid hormone biosynthesis                 | 6.43 | HSD3B2, CYP3A4, CYP3A5, CYP3A7, HSD3B1, CYP11A1, HSD17B1, UGT1A9, CYP7A1, UGT2B11, UGT2B4, HSD17B6, UGT2B10, UGT2A3, SULT1E1, UGT2B15, AKR1D1, CYP19A1                                                                                                                                                                                                                                                                                          |
| hsa00053: Ascorbate and aldarate metabolism            | 5.37 | UGT1A9, UGT2B11, RGN, UGT2B4, UGT2B10, UGT2A3, UGT2B15                                                                                                                                                                                                                                                                                                                                                                                          |
| hsa04610: Complement and coagulation cascades          | 5.10 | KNG1, F11, PLAT, MBL2, C7, MASP2, F13A1, C6, F9, C4BPB, C4BPA, F13B, F3, KLKB1, SERPINA5, SERPIND1, CPB2                                                                                                                                                                                                                                                                                                                                        |
| hsa00040: Pentose and glucuronate interconversions     | 5.02 | UGT1A9, KL, AKR1B10, UGT2B11, UGT2B4, UGT2B10, UGT2A3, UGT2B15                                                                                                                                                                                                                                                                                                                                                                                  |
| hsa05034: Alcoholism                                   | 4.92 | HIST1H2AB, HIST1H4L, HIST1H2AG, HIST1H2AE, HIST1H2BO, HIST2H2AB, HIST1H2BM, HIST1H4A, HIST1H2BL, HIST1H2BI, HIST2H2AC, HIST1H2BJ, H2AFX, HIST3H2BB, HIST1H4I, HIST1H4J, HIST2H3A, HIST1H3J, HIST1H2BB, HIST1H2BC, HIST1H2BE, HIST1H2BF, HIST1H2BG, HIST1H2BH, FOSB, HIST2H3C, HIST2H3D, HIST2H2BF, NTRK2, HIST1H3A, HIST1H3B, HIST1H2AI, HIST1H2AH, HIST1H3C, HIST1H3E, HIST1H2AJ, HIST1H3F, HIST1H2AM, HIST1H3G, HIST1H2AL, HIST1H3H, HIST1H3I |
| hsa00982: Drug metabolism - cytochrome P450            | 4.88 | GSTA1, CYP3A4, GSTA2, CYP3A5, ALDH3B2, ADH1B, ADH1A, FMO5, UGT1A9, FMO1, ADH4, UGT2B11, UGT2B4, UGT2A3, UGT2B10, UGT2B15                                                                                                                                                                                                                                                                                                                        |
| hsa00830: Retinol metabolism                           | 4.86 | CYP3A4, CYP3A5, UGT1A9, CYP3A7, ADH4, UGT2B11, ADH1B, UGT2B4, CYP26A1, HSD17B6, ADH1A, UGT2B10, UGT2A3, UGT2B15, RDH5                                                                                                                                                                                                                                                                                                                           |
| hsa05204: Chemical carcinogenesis                      | 4.40 | GSTA1, CYP3A4, GSTA2, CYP3A5, CYP3A7, NAT2, ADH1B, ALDH3B2, ADH1A, CYP3A43, UGT1A9, ADH4, UGT2B11, UGT2B4, UGT2A3, UGT2B10, UGT2B15                                                                                                                                                                                                                                                                                                             |
| hsa00983: Drug metabolism - other enzymes              | 4.05 | CYP3A4, UGT1A9, NAT2, UGT2B11, UGT2B4, UGT2B10, UGT2A3, UGT2B15, TK1                                                                                                                                                                                                                                                                                                                                                                            |
| hsa00980: Metabolism of xenobiotics by cytochrome P450 | 3.92 | GSTA1, CYP3A4, CYP3A5, GSTA2, ALDH3B2, ADH1B, ADH1A, UGT1A9, ADH4, UGT2B11, UGT2B4, UGT2A3, UGT2B10, UGT2B15                                                                                                                                                                                                                                                                                                                                    |
| hsa04110: Cell cycle                                   | 3.01 | CDC6, CDK1, PKMYT1, TTK, CDC20, ESPL1, PTTG1, MCM2, CDC25C, CCNB1, CDKN1C, MAD2L1, CCNB2, PLK1, CDKN2C, BUB1, BUB1B, CCNA2                                                                                                                                                                                                                                                                                                                      |
| hsa04114: Oocyte meiosis                               | 2.61 | CCNB1, CDK1, MAD2L1, CCNB2, PLK1, SGO1, BUB1, FBXO43, PKMYT1, AURKA, ESPL1, CDC20, PTTG1, CDC25C                                                                                                                                                                                                                                                                                                                                                |
| hsa05202: Transcriptional misregulation in cancer      | 2.36 | PLAT, HIST2H3A, NFKBIZ, HIST1H3J, MMP9, MMP3, HIST2H3C, HIST2H3D, HHEX, EYA1, CDKN2C, HIST1H3A, HIST1H3B, HIST1H3C,                                                                                                                                                                                                                                                                                                                             |

|  |  |                                                     |
|--|--|-----------------------------------------------------|
|  |  | HIST1H3E, HIST1H3F, HIST1H3G, HIST1H3H,<br>HIST1H3I |
|--|--|-----------------------------------------------------|

28 **Table S4.** Upregulated and downregulated KEGG pathways, Related to Figure 2.

29



| <i>Ensembl ID</i> | <i>Gene</i> | <i>Log<sub>2</sub>FC</i> | <i>p</i> <sub>adj</sub> |
|-------------------|-------------|--------------------------|-------------------------|
| ENSG00000197444   | OGDHL       | 1.08547769               | 3.29E-30                |
| ENSG00000166411   | IDH3A       | 0.74709247               | 7.70E-20                |
| ENSG00000204370   | SDHD        | 0.3777972                | 0.0003                  |
| ENSG00000100412   | ACO2        | 0.26021698               | 0.002                   |
| ENSG00000146701   | MDH2        | 0.23945724               | 0.0009                  |
| ENSG00000073578   | SDHA        | -0.1593416               | 0.03                    |
| ENSG00000138413   | IDH1        | -0.1812103               | 0.03                    |
| ENSG00000168291   | PDHB        | -0.2026402               | 0.02                    |
| ENSG00000131828   | PDHA1       | -0.2107741               | 0.01                    |
| ENSG00000163541   | SUCLG1      | -0.2111892               | 0.006                   |
| ENSG00000143252   | SDHC        | -0.2414483               | 0.02                    |
| ENSG00000150768   | DLAT        | -0.2619025               | 0.0003                  |
| ENSG00000091483   | FH          | -0.4936542               | 1.01E-12                |
| ENSG00000014641   | MDH1        | -0.5085681               | 3.36E-13                |
| ENSG00000101365   | IDH3B       | -0.5405112               | 5.07E-13                |
| ENSG00000067829   | IDH3G       | -0.5829934               | 1.14E-09                |
| ENSG00000100889   | PCK2        | -0.5852916               | 3.07E-18                |
| ENSG00000131473   | ACLY        | -0.6074454               | 9.80E-24                |
| ENSG00000173599   | PC          | -0.9409933               | 3.13E-37                |
| ENSG00000182054   | IDH2        | -1.0677314               | 8.52E-45                |

30 **Table S5.** [Dysregulated genes in the TCA Cycle KEGG pathway], Related to Figure 2.

31

| <b>Ensembl ID</b> | <b>Gene</b> | <b>Log<sub>2</sub>FC</b> | <b>padj</b> |
|-------------------|-------------|--------------------------|-------------|
| ENSG00000147614   | ATP6V0D2    | 3.973933876              | 9.35E-140   |
| ENSG00000198763   | ND2         | 1.473526224              | 2.53E-06    |
| ENSG00000198888   | ND1         | 1.363322749              | 6.19E-05    |
| ENSG00000198840   | ND3         | 1.217622162              | 2.54E-33    |
| ENSG00000212907   | ND4L        | 1.095495883              | 0.0001      |
| ENSG00000198886   | ND4         | 0.866690501              | 0.002       |
| ENSG00000114573   | ATP6V1A     | 0.803262336              | 2.80E-32    |
| ENSG00000198804   | COX1        | 0.656245362              | 1.17E-09    |
| ENSG00000198899   | ATP6        | 0.634543196              | 0.009       |
| ENSG00000198938   | COX3        | 0.632275024              | 2.80E-10    |
| ENSG00000171130   | ATP6V0E2    | 0.589272395              | 2.52E-11    |
| ENSG00000198727   | CYTB        | 0.557687429              | 0.02        |
| ENSG00000047249   | ATP6V1H     | 0.506014583              | 5.94E-13    |
| ENSG00000117410   | ATP6V0B     | 0.479535962              | 2.58E-11    |
| ENSG00000147416   | ATP6V1B2    | 0.437789019              | 5.51E-09    |
| ENSG00000128609   | NDUFA5      | 0.381648881              | 0.0008      |
| ENSG00000204370   | SDHD        | 0.377797199              | 0.0003      |
| ENSG00000198712   | COX2        | 0.322901415              | 0.005       |
| ENSG00000073578   | SDHA        | -0.159341647             | 0.04        |
| ENSG00000023228   | NDUFS1      | -0.210017339             | 0.002       |
| ENSG00000112695   | COX7A2      | -0.211631763             | 0.02        |
| ENSG00000156467   | UQCRB       | -0.2162753               | 0.03        |
| ENSG00000167792   | NDUFV1      | -0.222597617             | 0.007       |
| ENSG00000135390   | ATP5MC2     | -0.222831627             | 0.002       |
| ENSG00000143252   | SDHC        | -0.24144827              | 0.02        |
| ENSG00000160194   | NDUFV3      | -0.242343108             | 0.004       |
| ENSG00000131100   | ATP6V1E1    | -0.274149444             | 2.61E-05    |
| ENSG00000189043   | NDUFA4      | -0.277227615             | 0.0001      |
| ENSG00000176340   | COX8A       | -0.278696825             | 0.001       |
| ENSG00000165264   | NDUFB6      | -0.28300413              | 0.005       |
| ENSG00000213619   | NDUFS3      | -0.29075047              | 0.001       |
| ENSG00000178741   | COX5A       | -0.297956503             | 9.27E-05    |
| ENSG00000110719   | TCIRG1      | -0.300385483             | 0.002       |
| ENSG00000090266   | NDUFB2      | -0.301527793             | 0.001       |
| ENSG00000174886   | NDUFA11     | -0.318594422             | 0.001       |
| ENSG00000169021   | UQCRFS1     | -0.319382279             | 2.33E-05    |
| ENSG00000130414   | NDUFA10     | -0.320916351             | 3.89E-05    |
| ENSG00000131143   | COX4I1      | -0.336149045             | 2.75E-07    |
| ENSG00000158864   | NDUFS2      | -0.343567449             | 4.23E-06    |
| ENSG00000139180   | NDUFA9      | -0.357605693             | 0.0006      |
| ENSG00000004779   | NDUFAB1     | -0.360587197             | 2.52E-05    |
| ENSG00000184076   | UQCR10      | -0.375287362             | 3.00E-06    |
| ENSG00000116459   | ATP5PB      | -0.379803823             | 9.50E-08    |
| ENSG00000126267   | COX6B1      | -0.388197692             | 3.84E-08    |
| ENSG00000100554   | ATP6V1D     | -0.405728961             | 7.75E-08    |
| ENSG00000131495   | NDUFA2      | -0.419069805             | 1.65E-06    |
| ENSG00000115286   | NDUFS7      | -0.422028053             | 0.0002      |
| ENSG00000136888   | ATP6V1G1    | -0.428892928             | 2.02E-09    |
| ENSG00000183648   | NDUFB1      | -0.432392964             | 0.0003      |
| ENSG00000154518   | ATP5MC3     | -0.445435152             | 1.00E-08    |
| ENSG00000125356   | NDUFA1      | -0.459056555             | 2.84E-07    |
| ENSG00000179091   | CYC1        | -0.468189203             | 1.54E-09    |

|                 |          |              |          |
|-----------------|----------|--------------|----------|
| ENSG00000127540 | UQCR11   | -0.475454692 | 4.04E-09 |
| ENSG00000110955 | ATP5F1B  | -0.49393262  | 1.83E-16 |
| ENSG00000099795 | NDUFB7   | -0.509075592 | 1.10E-09 |
| ENSG00000168653 | NDUFS5   | -0.520875625 | 8.23E-11 |
| ENSG00000159720 | ATP6V0D1 | -0.540902137 | 6.67E-12 |
| ENSG00000147123 | NDUFB11  | -0.542107011 | 1.51E-08 |
| ENSG00000178127 | NDUFV2   | -0.542969651 | 0.006    |
| ENSG00000124172 | ATP5F1E  | -0.574462256 | 1.96E-13 |
| ENSG00000152234 | ATP5F1A  | -0.606022757 | 1.10E-17 |
| ENSG00000140990 | NDUFB10  | -0.613088113 | 6.15E-12 |
| ENSG00000119013 | NDUFB3   | -0.65837698  | 2.66E-11 |
| ENSG00000169020 | ATP5ME   | -0.663226048 | 5.18E-18 |
| ENSG00000159199 | ATP5MC1  | -0.712677613 | 1.05E-19 |
| ENSG00000241468 | ATP5MF   | -0.735984185 | 1.21E-15 |
| ENSG00000099624 | ATP5F1D  | -0.737422752 | 3.56E-17 |
| ENSG00000169429 | CXCL8    | -0.820462236 | 3.09E-17 |
| ENSG00000164405 | UQCRQ    | -0.860634282 | 1.66E-38 |
| ENSG00000198695 | ND6      | -0.979723775 | 1.42E-08 |
| ENSG00000143882 | ATP6V1C2 | -1.543440061 | 0.005    |

32 **Table S6.** [Dysregulated genes in the Oxidative Phosphorylation KEGG pathway], Related to

33 Figure 2

34

| Ensembl ID      | Gene symbol | mRNA expression fold change | 5hmC fold change |
|-----------------|-------------|-----------------------------|------------------|
| ENSG00000181418 | DDN         | 3.57                        | -2.84            |
| ENSG00000105131 | EPHX3       | 2.38                        | -3.82            |
| ENSG00000086619 | ERO1B       | 1.65                        | 4.05             |
| ENSG00000147408 | CSGALNACT1  | 1.33                        | 3.09             |
| ENSG00000149927 | DOC2A       | 1.26                        | -2.49            |
| ENSG00000142156 | COL6A1      | 1.24                        | 3.13             |
| ENSG00000137752 | CASP1       | 0.98                        | 2.44             |
| ENSG00000119900 | OGFRL1      | 0.71                        | 2.21             |
| ENSG00000145247 | OCIAD2      | 0.71                        | 3.02             |
| ENSG00000183044 | ABAT        | -1.26                       | 3.04             |
| ENSG00000144395 | CCDC150     | -1.50                       | 3.36             |
| ENSG00000167874 | TMEM88      | -2.02                       | 3.60             |

**Table S7.** [Promoter regions of genes with both altered mRNA expression and enrichment of 5hmC], Related to Figure 7.

35  
36  
37  
  
38  
  
39  
  
40  
  
41  
  
42  
  
43  
  
44  
  
45  
  
46  
  
47  
  
48  
  
49  
  
50  
  
51  
  
52  
  
53  
  
54

**Transparent methods**

56 **Differentiation of pluripotent human stem cells to hepatocyte-like cells and induction**  
57 **of intracellular lipid accumulation**

58 Human female H9 pluripotent stem cells (PSCs) were differentiated to hepatocyte-like cells  
59 (HLCs) as previously described (Wang et al., 2017). Unless otherwise stated, compounds for  
60 this protocol were purchased from Thermo Fisher. Briefly, H9 cells were cultured on Laminin  
61 521 coated plates, with mTeSR1 media, which contained 10  $\mu$ M ROCK inhibitor. H9s were  
62 initially differentiated to an endoderm phenotype in RPMI 1640 media containing 100 ng/mL  
63 Activin A (R & D Systems), and 50 ng/mL Wnt3A (Peprotech). Endodermal cells were then  
64 differentiated to a hepatoblast phenotype by culturing in Knockout DMEM, containing 20%  
65 Knockout Serum Replacement. Finally, cells were differentiated to a HLC phenotype by  
66 culturing in HepatoZYME media containing 10 ng/mL hepatocyte growth factor (Peprotech),  
67 20 ng/mL oncostatin M (Peprotech), and 10  $\mu$ M hydrocortisone 21-hemisuccinate (Sigma  
68 Aldrich), until day 17, at which point the cells were used for the assays described in this  
69 manuscript.

70

71 HLCs were cultured in a 96-well format for measurements of lipid accumulation and in a 6-  
72 well format for all other analyses. Each well is a separate differentiation event and represents  
73 a biological replicate. Intracellular lipid accumulation was induced in HLCs, as previously  
74 described (Lyall et al., 2018). Briefly, at day 17, HLCs were incubated in HepatoZYME media  
75 only (controls) or HepatoZYME media containing a cocktail of sodium L-lactate (L; 10mM),  
76 sodium pyruvate (P; 1 mM) and octanoic acid (O; 2 mM) (Sigma, Gillingham, UK) (LPO) for a  
77 period of 48 hours. For isotopic tracing studies, lactate was replaced with  $^{13}\text{C}_3$ -lactate (CK  
78 Isotopes, CLM-1579-05). For mechanistic studies, HLCs were exposed to either 5-  
79 Aminoimidazole-4-carboxamide-1- $\beta$ -D-ribofuranosyl 5'-monophosphate (AICAR; 1mM;  
80 Sigma-Aldrich, A1393-50MG), O-(Carboxymethyl)hydroxylamine hemihydrochloride (AOA;  
81 100  $\mu$ M ; Sigma-Aldrich, C13408-1G) or AICAR combined with monomethyl fumarate (50  $\mu$ M;  
82 Sigma-Aldrich, 651419-1G) for the same duration as LPO.

83

#### 84 **Cell mitochondrial stress test assay**

85 The oxygen consumption rate (OCR) of LPO-exposed HLCs was measured using the Agilent  
86 Seahorse XF Cell Mito Stress Test Kit (Agilent, 103015-100) on a Seahorse XF Analyser  
87 (Agilent, California, USA). Data were collected from two separate plates, with each well  
88 representing a biological replicate and each plate representing a technical replicate. Analyses  
89 were performed under basal conditions and following treatment with oligomycin A (an ATPase  
90 inhibitor), carbonyl-cyanide-4-(trifluoromethoxy) phenylhydrazone (FCCP; an ETC uncoupler),  
91 and combined rotenone and antimycin A (inhibitors of complex I and III, respectively). Two  
92 concentrations of FCCP (0.5  $\mu$ M and 1.0  $\mu$ M) were used for optimisation. Since replicates  
93 within each group responded similarly to each other, results were combined. OCR was  
94 normalised to total protein for each well, using the sulforhodamine B (SRB) assay, as  
95 previously described (Orellana and Kasinski, 2016), but with spectrophotometric  
96 measurements read at 540 nm.

97

#### 98 **Citrate synthase assay**

99 Citrate synthase activity was assessed as a readout of mitochondrial integrity (Boutagy et al.,  
100 2015; Short et al., 2005). Mitochondria were isolated using the Mitochondria Isolation Kit for  
101 Cultured Cells (Thermo Scientific, 89874), as per the manufacturer's instructions, selecting  
102 option A for isolation. Citrate synthase activity, a marker of mitochondrial integrity, was then  
103 measured using the Citrate Synthase Activity Colorimetric Assay Kit (BioVision, K318), as per  
104 the manufacturer's instructions.

105

106

107

#### 108 **Protein Extraction**

109 Adherent HLCs were washed once with ice-cold PBS, before incubating in ice-cold RIPA Lysis  
110 and Extraction Buffer (Thermo Scientific, 89900) supplemented with cOmplete Protease

111 Inhibitor Cocktail tablets (1/10 mL buffer; Roche, 11697498001). The suspended HLCs were  
112 placed on ice for 30 minutes, vortexing every 3 minutes, before centrifuging for 20 min at 4  
113 °C, 12,000 rpm. The supernatant was collected and stored at -80 °C until needed.

114

### 115 **Western blot analysis**

116 Protein quantification was performed using the Qubit Protein Assay Kit (Invitrogen, Q33211),  
117 as per the manufacturer's instructions. Protein concentration was measured using a Qubit  
118 Fluorometer (Invitrogen, Massachusetts, USA). Equal concentrations (50 µg) of HLC protein  
119 extract in 4 x Sample Loading Buffer (Li-Cor, 928-40004) were loaded onto NuPAGE 4-12%  
120 Bis-Tris Protein Gels (Invitrogen, NP0326BOX). Following resolution, protein was transferred  
121 to a methanol-activated polyvinylidene difluoride (PVDF) membrane. Protein transfer was  
122 measured using Revert 700 Total Protein Stain Kit (Li-Cor, 926-11010) as per the  
123 manufacturer's instructions. To enable probing with different antibodies, membranes were  
124 then sliced (images shown in Figure S1), blocked with Tris-buffered saline containing Tween  
125 20 (TBST) and 5% skimmed milk powder, and incubated with either Pyruvate Dehydrogenase  
126 (staining total  $\alpha$ 1 and  $\alpha$ 2 subunits) (C54G1) Rabbit mAb (Cell Signaling Technology, 3205) or  
127 SDHA (D6J9M) XP Rabbit mAb (Cell Signaling Technology, 11998), both a 1:1000 dilution.  
128 The membranes were washed in TBST before incubating with the secondary antibody, IRDye  
129 680RD Donkey anti-Mouse IgG (Li-Cor, 926-68072) at a 1:10,000 dilution, for 1 h at room  
130 temperature, in the dark, with shaking. Blots were visualised on a Li-Cor Odyssey CLx (Li-Cor,  
131 Nebraska, USA), and bands normalised to the Revert 700 Total Protein Stain, as per the  
132 manufacturer's instructions.

133

### 134 **RNA-seq analysis**

135 Total RNA was extracted from HLCs using the Monarch<sup>®</sup> Total RNA Miniprep Kit (New  
136 England BioLabs, T2010). RNA integrity was assessed using a Bioanalyzer (Agilent) with the  
137 RNA 6000 Nano kit. All samples had a RIN value >7.0. mRNA sequencing was performed on  
138 3 biological replicates per group by the Beijing Genomics Institute (BGI) (Shenzhen, China).

139 Library preparation was performed with the TruSeq Stranded mRNA Library Preparation kit  
140 (Illumina, RS-122-2101), with additional use of the Ribo-Zero Gold rRNA Removal Kit  
141 (Illumina, MRZG12324). Paired-end sequencing was performed on an Illumina HiSeq 4000,  
142 with each sample sequenced to a depth >60 million reads. The generated FASTQ files were  
143 trimmed to remove adapters, using Trimmomatic (version 0.36) (Bolger et al., 2014), before  
144 performing quality control with FastQC (version 0.11.4) (Andrews). Alignment was performed  
145 against the *Homo sapiens* GRCh19 assembly. The assembly was first indexed using STAR  
146 (version 2.5.1b) before mapping trimmed reads, using STAR (version 2.5.1b) in paired-end  
147 mode with default behaviour (Dobin and Gingeras, 2015). Duplicate reads were removed  
148 using Picard (version 2.7.11) (2018), before using featureCounts to generate raw read counts  
149 for each gene. Differential gene expression (DEG) analysis was performed using DESeq2  
150 (Love et al., 2014). Heatmaps were generated with Heatmapper (Babicki et al., 2016).  
151 Pathway enrichment analysis was performed using the Kyoto Encyclopedia of Genes and  
152 Genomes (KEGG) function (Kanehisa, 2019; Kanehisa and Goto, 2000; Kanehisa et al., 2019)  
153 of the Database for Annotation, Visualization, and Integrated Discovery (DAVID) (Huang et  
154 al., 2009a, 2009b).

155

### 156 **Real-time quantitative PCR**

157 RNA was taken from that prepared for RNA-sequencing. cDNA was generated using the High  
158 Capacity cDNA Reverse Transcriptase Kit (Applied Biosystems, 4368814). A master mix was  
159 prepared using PerfeCTa FastMix II (Quanta Biosciences, Inc., 95118-250). cDNA was  
160 amplified and quantified using the Universal Probe Library (Roche, Burgess Hill, UK) system  
161 on a Roche LightCycler 480 (Roche Diagnostics Ltd, Switzerland). Primer sequences and  
162 Universal Probe Library probes are detailed in Table S1.

163

164 For quantifying mitochondrial and nuclear DNA, we purified DNA using the Monarch®  
165 Genomic DNA Purification Kit (NEB, USA), as per the manufacturer's instructions. DNA was  
166 quantified by using the Luna® Universal qPCR Master Mix (NEB, USA) on a Roche



167 LightCycler 480 (Roche Diagnostics Ltd, Switzerland). Primer sequences and Universal Probe  
168 Library probes are detailed in Table S2.

169

## 170 **NMR Spectroscopy**

171 This protocol was previously described by Hollinshead *et al* (Hollinshead et al., 2018). At the  
172 conclusion of tracer experiments, cells were washed with 2 mL ice-cold 0.9% saline solution  
173 and quenched with 0.3 mL pre-chilled methanol (-20 °C). After adding an equal volume of ice-  
174 cold HPLC-grade water containing 1 µg/mL D6-glutaric acid (C/D/N Isotopes Inc), cells were  
175 collected with a cell scraper and transferred to tubes containing 0.3 mL of chloroform (-20 °C).  
176 The extracts were shaken at 1400 rpm for 20 min at 4 °C and centrifuged at 16,000 x g for 5  
177 min at 4 °C. Then, 0.3 mL of the upper aqueous phase was collected and evaporated in  
178 eppendorfs, under a vacuum using a Savant™ SpeedVac™ Concentrator (ThermoFisher).  
179 These samples were used either for NMR spectroscopy or for GC-MS. For NMR, dried  
180 samples were re-suspended in 60 µL of 100 mM sodium phosphate buffer (pH 7.0) containing  
181 500 µM DSS and 2 mM Imidazole, 10% D<sub>2</sub>O, pH 7.0. Samples were vortexed, sonicated (5-  
182 15 min) and centrifuged briefly, before transferred to 1.7 mm NMR tubes using an automated  
183 Gilson. One-dimensional (1D)-<sup>1</sup>H NMR spectra and two-dimensional (2D)-<sup>1</sup>H,<sup>13</sup>C  
184 Heteronuclear Single Quantum Coherence Spectroscopy (HSQC) NMR spectra were  
185 acquired using a 600 MHz Bruker Avance III spectrometer (Bruker Biospin) with an inverse  
186 cryogenic probe for 1.7 mm NMR sample tubes, fitted with a z-axis pulsed field gradient, at  
187 300 K. Spectral widths were set to 13 and 160 ppm for the <sup>1</sup>H and <sup>13</sup>C dimensions, respectively.  
188 For the indirect (<sup>13</sup>C) dimension of the 2D-<sup>1</sup>H,<sup>13</sup>C HSQC NMR spectra, 1228 out of 4096 (30%)  
189 data points were acquired using a non-uniform sampling scheme. <sup>13</sup>C-<sup>13</sup>C splittings were  
190 enhanced 4-fold in the <sup>13</sup>C dimension. Each sample was automatically tuned, matched and  
191 then shimmed (1D-TopShim) to a DSS line width of <1 Hz before acquisition of the first  
192 spectrum. Total experiment time was ~15 min per sample for 1D-<sup>1</sup>H NMR spectra and 1 h per  
193 sample for 2D-<sup>1</sup>H,<sup>13</sup>C HSQC NMR spectra. 1D-<sup>1</sup>H NMR spectra were processed using the

194 MATLAB-based MetaboLab software (Ludwig and Günther, 2011). All 1D data sets were  
195 apodized using a 0.3 Hz exponential window function and zero-filled to 131,072 data points  
196 before Fourier Transformation. The chemical shift was calibrated by referencing the DSS  
197 signal to 0 ppm. 1D-<sup>1</sup>H NMR spectra were manually phase corrected. Baseline correction was  
198 achieved using a spline function (Ludwig and Günther, 2011). 1D-<sup>1</sup>H-NMR spectra were  
199 exported into Bruker format for metabolite identification and concentration determination using  
200 Chenomx 7.0 (Chenomx INC). 2D-<sup>1</sup>H,<sup>13</sup>C HSQC NMR spectra were reconstructed using  
201 compressed sensing in the MDDNMR and NMRpipe software (Delaglio et al., 1995;  
202 Kazimierczuk and Orekhov, 2011; Orekhov and Jaravine, 2011). The final spectrum size was  
203 922 real data points for the <sup>1</sup>H dimension and 16,384 real data points for the <sup>13</sup>C dimension.  
204 Analysis was performed using MetaboLab and pyGamma software was used in multiplet  
205 simulations (Smith et al., 1994). The methyl group of lactate was used to calibrate the chemical  
206 shift based on its assignment in the human metabolome database (Wishart et al., 2013).

207

## 208 **GC-MS**

209 Dried polar metabolites were purified as described for NMR spectroscopy. These were  
210 derivatised by incubating with 40 µL 2% methoxyamine hydrochloride (Sigma Aldrich, 226904)  
211 in pyridine (Thermo Fisher Scientific, 25104) at 60 °C for 1 h, followed by incubation with 60  
212 µL *N*-methyl-*N*-*tert*-butyldimethylsilyltrifluoroacetamide with 1% *tert*-butyldimethylchlorosilane  
213 (MTBSTFA with 1% t-BDMCS) at 60 °C for 1 h.

214

215 GC-MS analysis was performed using an Agilent 6890GC in combination with an Agilent  
216 5975C MS. The MS was operated under electron impact ionization at 70 eV with the source  
217 held at 230 °C and the quadrupole at 150 °C. Helium was used as the carrier gas and  
218 maintained at a flow rate of 1 mL/min. 1 µL of derivatised sample was injected (splitless) with  
219 an inlet temperature of 280 °C on to a Rxi-5MS column (Restek) The oven temperature was  
220 held at 100 °C for 1 min then increased at a rate of 5 °C/min up to a maximum temperature of

221 330 °C. Ions were detected using selected ion monitoring (SIM) mode as previously described  
222 (Battello et al., 2016). MetaboliteDetector software was used to correct for the natural isotope  
223 distribution and to determine the mass isotopomer distribution (MID) (Hiller et al., 2009).

224

#### 225 **DNA hydroxymethylation immunoprecipitation and sequencing (hmeDIP-sequencing)**

226 DNA was purified using the Monarch<sup>®</sup> Genomic DNA Purification kit (New England BioLabs,  
227 T3010S). DNA immunoprecipitation and sequencing was performed as previously described,  
228 using the Ion Proton platform (Thomson et al., 2015), with the addition of an IgG control  
229 (Merck, 12-370). We validated the DNA immunoprecipitation protocol on Roche LightCycler  
230 480 (Roche Diagnostics Ltd, Switzerland), using the primer sets described in Table S3. We  
231 sequenced three biological replicates per group. A mean read length of 137-147 base pairs  
232 and 21,130,039 - 31,693,844 reads per sample was achieved. Reads were aligned to the hg19  
233 genome using Torrent Suite v5.2.0. Aligned reads were sorted using SAMtools, before calling  
234 peaks using MACS2 (v. 2.1.1) -f BAM --broad --broad-cutoff 0.05 -B -g hs, over corresponding  
235 inputs (Zhang et al., 2008). To detect differentially hydroxymethylated regions (DHRs), we  
236 used Diffbind with DESeq2 (Stark and Brown). For Diffbind analysis, data were normalised to  
237 a pooled input for each group and an IgG control. DHMRs were assigned to genes and other  
238 genomic features using the HOMER (v. 4.8; hg19) annotatePeaks tools (Heinz et al., 2010).  
239 For candidate hmeDIP analysis, the concentration of each sample was extrapolated from a  
240 standard curve of arbitrary concentrations and normalised to 10% input. Regions of interest  
241 were identified from the hmeDIP-sequencing dataset. Primers were designed using the NCBI  
242 primer-BLAST software (Table S2). Data are available through the Gene Expression Omnibus  
243 (GSE144955). Sliding window profiles and heatmaps were generated using deepTools  
244 (Ramírez et al., 2014), using the plotProfile and plotHeatmap functions, respectively, with  
245 blacklisted regions subtracted.

246

#### 247 **High content analysis microscopy**

248 Cells were stained with a cell painter assay, adapted from Lyall *et al* and Bray *et al* (Bray et  
249 al., 2016; Lyall et al., 2018). Cells were fixed with 50  $\mu$ L/well 4% (wt/vol) paraformaldehyde  
250 (Electron Microscopy Sciences, 15710-S) for 15 minutes at room temperature. For  
251 permeabilisation, cells were incubated in 0.1% Triton X-100 (Sigma-Aldrich, T8787) in PBS  
252 for 15 minutes at room temperature. For lipid droplet analysis, cells were then stained with a  
253 combination of NucBlue Live ReadyProbes<sup>®</sup> Reagent (2 drops/mL) (Molecular Probes,  
254 R37605), HCS CellMask<sup>™</sup> Red (2  $\mu$ L/10 mL) (Invitrogen, H32712), and BODIPY<sup>™</sup> 493/503  
255 (1:1000) (Life Sciences, D3922), as per the manufacturer's instructions. Following staining,  
256 images were acquired using an Operetta High Content Analysis microscope (Perkin Elmer,  
257 Buckinghamshire, UK). Lipid droplet morphology was analysed as previously described (Lyall  
258 et al., 2018).

259

## 260 **Statistical analysis**

261 All statistical analyses were performed using Graph Prism Version 8.0 for Windows or macOS,  
262 GraphPad Software, La Jolla California USA, [www.graphpad.com](http://www.graphpad.com). Normality of data  
263 distribution was measured using the Shapiro-Wilks test. Where indicated, data were analysed  
264 by unpaired Student's t-test, Mann-Whitney test, one-way analysis of variance (ANOVA) or  
265 two-way ANOVA. Data were considered to be significant where  $p < 0.05$ .

266

267

268 **References**

- 269 Andrews, S. FastQC: a quality control tool for high throughput sequence data.
- 270 Babicki, S., Arndt, D., Marcu, A., Liang, Y., Grant, J.R., Maciejewski, A., and Wishart, D.S.
- 271 (2016). Heatmapper: web-enabled heat mapping for all. *Nucleic Acids Res.* *44*, W147–
- 272 W153.
- 273 Battello, N., Zimmer, A.D., Goebel, C., Dong, X., Behrmann, I., Haan, C., Hiller, K., and
- 274 Wegner, A. (2016). The role of HIF-1 in oncostatin M-dependent metabolic reprogramming
- 275 of hepatic cells. *Cancer Metab.* *4*, 3.
- 276 Bolger, A.M., Lohse, M., and Usadel, B. (2014). Trimmomatic: A flexible trimmer for Illumina
- 277 sequence data. *Bioinformatics* *30*, 2114–2120.
- 278 Boutagy, N.E., Pyne, E., Rogers, G.W., Ali, M., Hulver, M.W., and Frisard, M.I. (2015).
- 279 Isolation of mitochondria from minimal quantities of mouse skeletal muscle for high
- 280 throughput microplate respiratory measurements. *J. Vis. Exp.* *2015*.
- 281 Bray, M.A., Singh, S., Han, H., Davis, C.T., Borgeson, B., Hartland, C., Kost-Alimova, M.,
- 282 Gustafsdottir, S.M., Gibson, C.C., and Carpenter, A.E. (2016). Cell Painting, a high-content
- 283 image-based assay for morphological profiling using multiplexed fluorescent dyes. *Nat.*
- 284 *Protoc.* *11*, 1757–1774.
- 285 Delaglio, F., Grzesiek, S., Vuister, G.W., Zhu, G., Pfeifer, J., and Bax, A. (1995). NMRPipe:
- 286 A multidimensional spectral processing system based on UNIX pipes. *J. Biomol. NMR* *6*,
- 287 277–293.
- 288 Dobin, A., and Gingeras, T.R. (2015). Mapping RNA-seq Reads with STAR. *Curr. Protoc.*
- 289 *Bioinforma.* *51*, 11.14.1-11.14.19.
- 290 Heinz, S., Benner, C., Spann, N., Bertolino, E., Lin, Y.C., Laslo, P., Cheng, J.X., Murre, C.,
- 291 Singh, H., and Glass, C.K. (2010). Simple Combinations of Lineage-Determining
- 292 Transcription Factors Prime cis-Regulatory Elements Required for Macrophage and B Cell
- 293 Identities. *Mol. Cell* *38*, 576–589.
- 294 Hiller, K., Hangebrauk, J., Jäger, C., Spura, J., Schreiber, K., and Schomburg, D. (2009).
- 295 Metabolite detector: Comprehensive analysis tool for targeted and nontargeted GC/MS

296 based metabolome analysis. *Anal. Chem.* *81*, 3429–3439.

297 Hollinshead, K.E.R., Munford, H., Eales, K.L., Bardella, C., Li, C., Escribano-Gonzalez, C.,  
298 Thakker, A., Nonnenmacher, Y., Kluckova, K., Jeeves, M., et al. (2018). Oncogenic IDH1  
299 Mutations Promote Enhanced Proline Synthesis through PYCR1 to Support the Maintenance  
300 of Mitochondrial Redox Homeostasis. *Cell Rep.* *22*, 3107–3114.

301 Huang, D.W., Sherman, B.T., and Lempicki, R.A. (2009a). Bioinformatics enrichment tools:  
302 Paths toward the comprehensive functional analysis of large gene lists. *Nucleic Acids Res.*  
303 *37*, 1–13.

304 Huang, D.W., Sherman, B.T., and Lempicki, R.A. (2009b). Systematic and integrative  
305 analysis of large gene lists using DAVID bioinformatics resources. *Nat. Protoc.* *4*, 44–57.

306 Kanehisa, M. (2019). Toward understanding the origin and evolution of cellular organisms.  
307 *Protein Sci.* *28*, 1947–1951.

308 Kanehisa, M., and Goto, S. (2000). KEGG: Kyoto Encyclopedia of Genes and Genomes.  
309 *Nucleic Acids Res.* *28*, 27–30.

310 Kanehisa, M., Sato, Y., Furumichi, M., Morishima, K., and Tanabe, M. (2019). New approach  
311 for understanding genome variations in KEGG. *Nucleic Acids Res.* *47*, D590–D595.

312 Kazimierczuk, K., and Orekhov, V.Y. (2011). Accelerated NMR spectroscopy by using  
313 compressed sensing. *Angew. Chemie - Int. Ed.* *50*, 5556–5559.

314 Love, M.I., Huber, W., and Anders, S. (2014). Moderated estimation of fold change and  
315 dispersion for RNA-seq data with DESeq2. *Genome Biol.* *15*, 550.

316 Ludwig, C., and Günther, U.L. (2011). MetaboLab - advanced NMR data processing and  
317 analysis for metabolomics. *BMC Bioinformatics* *12*, 366.

318 Lyall, M.J., Cartier, J., Thomson, J.P., Cameron, K., Meseguer-Ripolles, J., O’Duibhir, E.,  
319 Szkolnicka, D., Villarin, B.L., Wang, Y., Blanco, G.R., et al. (2018). Modelling non-alcoholic  
320 fatty liver disease in human hepatocyte-like cells. *Philos. Trans. R. Soc. B Biol. Sci.* *373*,  
321 20170362.

322 Orekhov, V.Y., and Jaravine, V.A. (2011). Analysis of non-uniformly sampled spectra with  
323 multi-dimensional decomposition. *Prog. Nucl. Magn. Reson. Spectrosc.* *59*, 271–292.

324 Orellana, E., and Kasinski, A. (2016). Sulforhodamine B (SRB) assay in cell culture to  
325 investigate cell proliferation. *Bio-Protocol* 6.

326 Ramírez, F., DüNDAR, F., Diehl, S., Grüning, B.A., and Manke, T. (2014). DeepTools: A  
327 flexible platform for exploring deep-sequencing data. *Nucleic Acids Res.* 42, W187-91.

328 Short, K.R., Bigelow, M.L., Kahl, J., Singh, R., Coenen-Schimke, J., Raghavakaimal, S., and  
329 Nair, K.S. (2005). Decline in skeletal muscle mitochondrial function with aging in humans.  
330 *Proc. Natl. Acad. Sci. U. S. A.* 102, 5618–5623.

331 Smith, S.A., Levante, T.O., Meier, B.H., and Ernst, R.R. (1994). Computer Simulations in  
332 Magnetic Resonance. An Object-Oriented Programming Approach. *J. Magn. Reson. Ser. A*  
333 106, 75–105.

334 Stark, R., and Brown, G. Differential Binding Analysis of ChIP-Seq Peak Data.

335 Thomson, J.P., Fawkes, A., Ottaviano, R., Hunter, J.M., Shukla, R., Mjoseng, H.K., Clark,  
336 R., Coutts, A., Murphy, L., and Meehan, R.R. (2015). DNA immunoprecipitation  
337 semiconductor sequencing (DIP-SC-seq) as a rapid method to generate genome wide  
338 epigenetic signatures. *Sci. Rep.* 5, 9778.

339 Wang, Y., Alhaque, S., Cameron, K., Meseguer-Ripolles, J., Lucendo-Villarin, B., Rashidi,  
340 H., and Hay, D.C. (2017). Defined and scalable generation of hepatocyte-like cells from  
341 human pluripotent stem cells. *J. Vis. Exp.* e55355–e55355.

342 Wishart, D.S., Jewison, T., Guo, A.C., Wilson, M., Knox, C., Liu, Y., Djoumbou, Y., Mandal,  
343 R., Aziat, F., Dong, E., et al. (2013). HMDB 3.0-The Human Metabolome Database in 2013.  
344 *Nucleic Acids Res.* 41, D801-7.

345 Zhang, Y., Liu, T., Meyer, C.A., Eeckhoute, J., Johnson, D.S., Bernstein, B.E., Nussbaum,  
346 C., Myers, R.M., Brown, M., Li, W., et al. (2008). Model-based analysis of ChIP-Seq  
347 (MACS). *Genome Biol.* 9, R137.

348 (2018). Picard Tools - By Broad Institute.

349
